# Supplementary material for: Inhibition of neddylation modification by MLN4924 sensitizes hepatocellular carcinoma cells to sorafenib
Source: PubMed Central journal article supplement — Oncol Rep. 2019 Apr 4;41(6):3257–69. doi: 10.3892/or.2019.7098 (PMC6489087; doi:10.3892/or.2019.7098), 2019-04-04
Supplement: Supplementary_Data.pdf [file Supplementary_Data.pdf]

Table SI. Patient's information.

| Patient ID | Sex | Age (years) | Sample collection time |
|------------|-----|-------------|------------------------|
| 2013306    | M   | 43          | 05.20.2013             |
| 2013311    | M   | 64          | 05.21.2013             |
| 2013321    | F   | 42          | 05.24.3013             |
| 2013324    | F   | 40          | 05.27.2013             |
| 2013326    | F   | 39          | 05.27.2013             |
| 2013338    | M   | 41          | 05.29.2013             |
| 2013382    | M   | 58          | 06.19.2013             |
| 2013383    | M   | 70          | 06.19.2013             |
| 2013386    | M   | 60          | 06.19.2013             |
| 2013390    | M   | 62          | 06.21.2013             |
| 2013394    | M   | 41          | 06.23.2013             |
| 2013395    | M   | 42          | 06.23.2013             |
| 2013400    | M   | 51          | 06.24.2013             |
| 2013412    | F   | 48          | 06.27.2013             |
| 2013423    | M   | 47          | 07.01.2013             |
| 2013426    | F   | 49          | 07.03.2013             |
| 2013428    | M   | 54          | 07.04.2013             |
| 2013433    | M   | 57          | 07.08.2013             |
| 2013437    | M   | 50          | 07.08.2013             |
| 2013446    | M   | 65          | 07.10.2013             |
| 2013475    | M   | 40          | 07.29.2013             |
| 2013476    | M   | 33          | 07.29.2013             |
| 2013487    | F   | 55          | 08.05.2013             |
| 2013488    | M   | 48          | 08.05.2013             |
| 2013508    | M   | 53          | 08.12.2013             |
| 2013526    | M   | 57          | 08.14.2013             |

M, male; F, female.
